# Supplementary material for: Merkel Cell Carcinoma Display PIEZO2 Immunoreactivity
Source: MDPI journal article supplement (doi:10.3390/jpm12060894), 2022-05-28
Supplement: s1 [file s1]

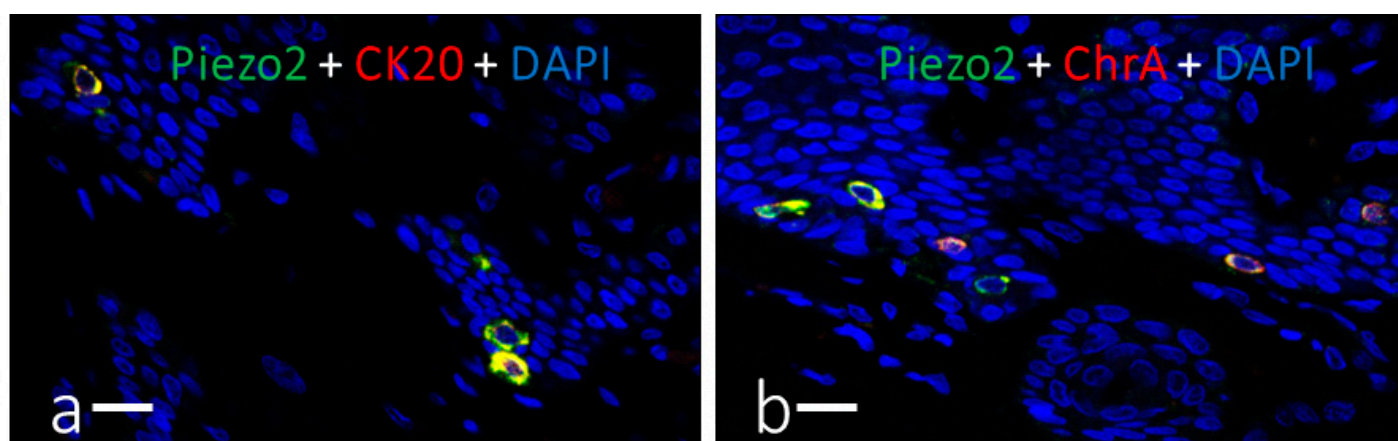

Figure S1. Epithelial CK20 Merkel cells in the epidermal basal layer demonstrate PIEZO2 immunostaining and CK20 coexpression (a,b). Scale bar 20 μm
